# Supplementary material
Source: PubMed Central journal article supplement (PMC6214364)
Supplement: NIHMS1508802-supplement-2.pdf [file NIHMS1508802-supplement-2.pdf]

| Mutant                                                 | Anti-HS phage display antibody |       |       |         |
|--------------------------------------------------------|--------------------------------|-------|-------|---------|
|                                                        | AO4B08                         | EV3C3 | HS4C3 | RB4EA12 |
| <i>Ndst1</i> <sup>-/-</sup>                            | ↓                              | ↓     | ↓     | ↓       |
| <i>Ndst2</i> <sup>-/-</sup>                            | ↓                              | ↓     | ↓     | ↓       |
| <i>Ndst1</i> <sup>-/-</sup> ; <i>2</i> <sup>-/-</sup>  | ↓                              | ↓     | ↓     | ↓       |
| <i>Glce</i> <sup>-/-</sup>                             | ↓                              | ↓     | ↓     | ↓       |
| <i>Hs2st</i> <sup>-/-</sup>                            | ↓                              | ↓     | -     | -       |
| <i>Hs6st1</i> <sup>-/-</sup>                           | ↓                              | ↓     | ↓     | ↓       |
| <i>Hs6st1</i> <sup>ff</sup> ; <i>2</i> <sup>-/-</sup>  | ↓                              | ↓     | ↓     | ↓       |
| <i>Hs6st1</i> <sup>-/-</sup> ; <i>6</i> <sup>-/-</sup> | ↓                              | ↓     | ↓     | ↓       |
| <i>Sulf1</i> <sup>-/-</sup> ; <i>2</i> <sup>-/-</sup>  | ↑                              | ↑     | ↑     | ↑       |
| <i>Hs3st1</i> <sup>-/-</sup>                           | ↓                              | ↓     | ↓     | ↓       |
| <i>Hs3st4</i> <sup>-/-</sup>                           | ↓                              | ↓     | ↓     | ↓       |
| <i>Hs3st1</i> <sup>-/-</sup> ; <i>4</i> <sup>-/-</sup> | ↓                              | ↓     | ↓     | ↓       |

**Supplementary Table 1. Summary of the effects of HS modification/remodeling gene deletion on cell surface anti-HS phage display antibody binding.** The circles highlight the difference between the antibody binding on the HS mutant MLECs and reported biochemical studies using chemically modified heparins and synthesized HS oligosaccharides. The green arrows indicate no biochemical data reported in literature.

**Supplementary Table 2. Genotyping Conditions and PCR Primers**

- 1) PCR condition: Heat activated DNA polymerase was applied to amplify the extracted genomic DNA. The PCR condition was as following: DNA polymerase activation at 95 °C for 15 minutes; DNA amplification for 40 cycles (95 °C for 55 s, 55 °C for 55 s, 72 °C for 90 s), extension at 72 °C for 5 min. The reaction then was held at 4 °C.
- 2) Primers

| Primer Name                                                                  | Primer Sequence (5'->3')                                                                                                                                                                   | Expected band Size                                                                                                                                                             |
|------------------------------------------------------------------------------|--------------------------------------------------------------------------------------------------------------------------------------------------------------------------------------------|--------------------------------------------------------------------------------------------------------------------------------------------------------------------------------|
| Cre3<br>Cre5                                                                 | ACGTTACCGGCATCAACGT<br>CTGCATTACCGGTCGATGCA                                                                                                                                                | 355 bp                                                                                                                                                                         |
| Ext1WTF<br>Ext1WTR<br>Ext1KOR                                                | GGAGTGTGGATGAGTTGAAG<br>CAACACTTTCAGCTCCAGTC<br>GAGAACAGGTACCCATGTTC                                                                                                                       | <i>Ext1<sup>f</sup></i> : 460 bp<br>WT : 389 bp<br><i>Ext1</i> : 500 bp                                                                                                        |
| Ndst1WTF<br>Ndst1WTR<br>Ndst1KOR                                             | TCCCACATGGCGAGACTGAGGTTT<br>CCAGGGCGTCAGGGCCTCTG<br>CATCCTCTGAGGTGACCGC                                                                                                                    | <i>Ndst1<sup>f</sup></i> : 280 bp<br>WT : 260 bp<br><i>Ndst</i> : 350 bp                                                                                                       |
| Ndst2WTF<br>Ndst2WTR<br>Ndst2KOR                                             | CCTGGCTGTTTGGTCTCTGT<br>CGCTTTCAATACAGGAGAGG<br>CTGCTCTTACTGAAGGCTC                                                                                                                        | WT : 701 bp<br><i>Ndst2</i> : 602 bp                                                                                                                                           |
| Hs2stWTF<br>Hs2stWTR<br>Hs2stKOR                                             | ATGGGGCTCCTCAGGATTATGATGC<br>TGCCCTAGGCTCAGGCATG<br>GTGCGGCCGTGGGGTCC                                                                                                                      | Hs2stWTF/Hs2stWTR:<br>WT : 609 bp,<br><i>Hs2st<sup>f</sup></i> : 747 bp<br><br>Hs2stWTF/Hs2stKOR:<br>WT 876 bp,<br><i>Hs2st<sup>f</sup></i> : 1178 bp<br><i>Hs2st</i> : 360 bp |
| Hs6st1WTF<br>Hs6st1WTR<br>Hs6st1hetTF<br>Hs6st1KOF<br>Hs6st1KOR              | CCAGCCACAGAAGTGAACA<br>CACCAACAGAAACAGGGCTA<br>GTGGGCTCTATGGCTTCTGA<br>CAGTCAATGCTTTGGACCACT<br>TCCACACCCACTTCTAGCT                                                                        | Hs6st1WTF/Hs6st1WTR/Hs6st1hetTF:<br>WT : 210 bp<br><i>Hs6st1<sup>f</sup></i> : 320 bp<br><br>Hs6st1KOF/Hs6st1KOR<br><i>Hs6st1</i> : 400 bp                                     |
| Hs6st2WTF<br>Hs6st2WTR<br>Hs6st2KOF<br>Hs6st2KOR                             | ATTTGCGGTGATCGTCCTCA<br>TGAGCTCGGTCCAGTCGGAT<br>GCCAGGTACGTGGTGAGCGAACG<br>TGACCTCCAGGAAGTCCATAAC                                                                                          | WT : 375 bp<br><i>Ndst2</i> : 800 bp                                                                                                                                           |
| Sulf1WTF<br>Sulf1WTR<br>Sulf1KOF<br>Sulf1KOR                                 | GCATAGAGTCAGTGGGTCAAAGTTG<br>GCCTCCTGACAAGGTTACTAGG<br>TCCCTCATATCAGAAAGTCTGG<br>GCCTCCTGACAAGGTTACTAGG                                                                                    | Sulf1wt : 150 bp<br><i>Sulf1<sup>f</sup></i> : 205 bp<br><i>Sulf1</i> : 400bp                                                                                                  |
| Sulf2WTF<br>Sulf2WTR<br>Sulf2KOF<br>Sulf2KOR                                 | ATCTCAACAGCACAGGCTACCG<br>ATGGCAACCCCTTCGTCATC<br>GCAGGTTTGTACCCAACGC<br>GGTACTCCCACAATAAACTGGTG                                                                                           | Sulf2wt : 495 bp<br><i>Sulf2<sup>f</sup></i> : 550 bp<br><i>Sulf2</i> : 480 bp                                                                                                 |
| FGFR1F<br>FGFR1R<br>FGFR2F<br>FGFR2R<br>FGFR3F<br>FGFR3R<br>FGFR4F<br>FGFR4R | TCCTGATCTCCTGCATGTTG<br>GGAAGTCGCTCTTCTTGGTG<br>TGCTACCCAAGGAATCGTTC<br>AGAGTGGATCGGATGGAG<br>TGGGCTAAGGATGGTACAGG<br>TTAGCACTTGCAGCCTCTGA<br>CCCTGAGGCCAGATACACAG<br>GGAGCACAAGCAGAACCAGT | FGFR1: 71 bp<br>FGFR2: 72 bp<br>FGFR3: 72 bp<br>FGFR4: 64 bp                                                                                                                   |
